.....

### Rules for the Stiftung C.-E. Alken-Prize

1. We would like to announce the establishment of an endowment fund under the name of Stiftung C.-E. Alken, for the purpose of furthering clinical work and research in the field of Urology in presenting an annual award of SFr. 10,000.– for outstanding scientific endeavours.
2. The award will be for an unpublished work in the field of Urology. An award certificate will also be presented. The prize money may be divided among several contributors.
3. The papers may be written in either German or English, and three copies have to be submitted by September 30, 1993 to:

Stiftungsrat C.-E. Alken-Stiftung  
Advokaturbüro Kellerhals & Partner  
PO Box  
CH-3000 Bern 7 (Switzerland)

4. Each submission must be affixed with a code word and must not bear the author's name. But, in addition, a sealed envelope labelled with the code word is to be included, containing on a separate sheet of paper the author's name and professional standing, together with the code word.
5. The adjudicators for the award will be the Board of Directors of the Endowment Fund, and their decision will be final.

Bern, January 1993

For the Stiftung C.-E. Alken:  
The Board of Directors:  
Prof. R. *Hohenfellner* (President)  
Prof. K. *Bandhauer*  
Prof. R. *Nagel*  
Prof. E. *Zingg*

.....

### 23rd Congress of the Polish Urological Association

October 14–16, 1993, Szczecin, Poland

The main topics: BPH; Free communications  
Place: The Pomeranian Dukes' Castle in Szczecin, Poland  
Languages: English and Polish with simultaneous translation  
President of Congress Committee: Prof. Andrzej Sikorski

Prof. Andrzej Sikorski  
Department of Urology  
Pomeranian Medical Academy  
A. Powstańców Wielkopolskich 72  
PL-70-111 Szczecin (Poland)  
Tel/Fax 82-04-42
